# Supplementary material for: Synthesis and characterization of homogeneous (U,Am)O2 and (U,Pu,Am)O2 nanopowders
Source: Royal Society of Chemistry journal article supplement (doi:10.1039/d2ce00527a), 2022-01-01
Supplement: d2ce00527a1.pdf [file d2ce00527a1.pdf]

# Synthesis and characterization of homogeneous (U,Am)O<sub>2</sub> and (U,Pu,Am)O<sub>2</sub> nanopowders

---

Jean-François Vigier,<sup>1,\*</sup> Daniel Freis,<sup>1</sup> Olaf Walter,<sup>1</sup> Oliver Dieste Blanco,<sup>1</sup> Daniel Bouëxière,<sup>1</sup> Evelyn Zuleger,<sup>1</sup> Natalia Palina,<sup>2</sup> Tonya Vitova,<sup>2</sup> Rudy J.M. Konings,<sup>1</sup> Karin Popa,<sup>1,\*\*</sup>

<sup>1</sup> European Commission, Joint Research Centre, Karlsruhe, Germany

<sup>2</sup> Institute for Nuclear Waste Disposal (INE), Karlsruhe Institute of Technology, P.O. 3640, D-76021 Karlsruhe, Germany

\* Corresponding author, e-mail: [jean-francois.vigier@ec.europa.eu](mailto:jean-francois.vigier@ec.europa.eu)

\*\* Corresponding author, e-mail: [karin.popa@ec.europa.eu](mailto:karin.popa@ec.europa.eu)

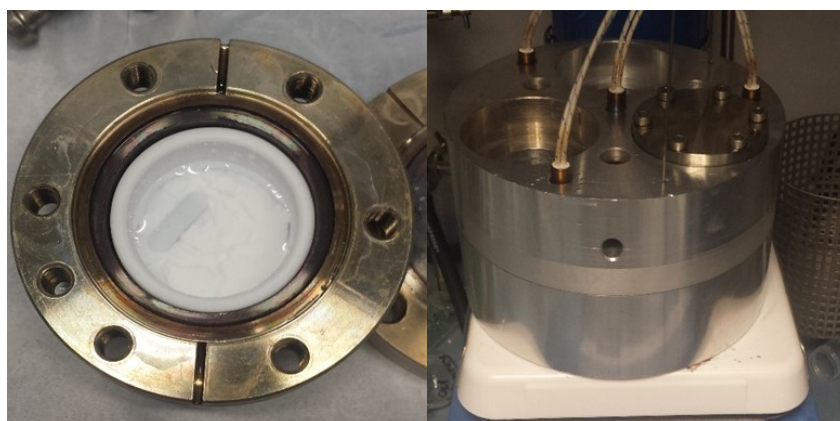

**Fig. S1** The autoclave (with Teflon insets) and the heating mantle used for the present experiment

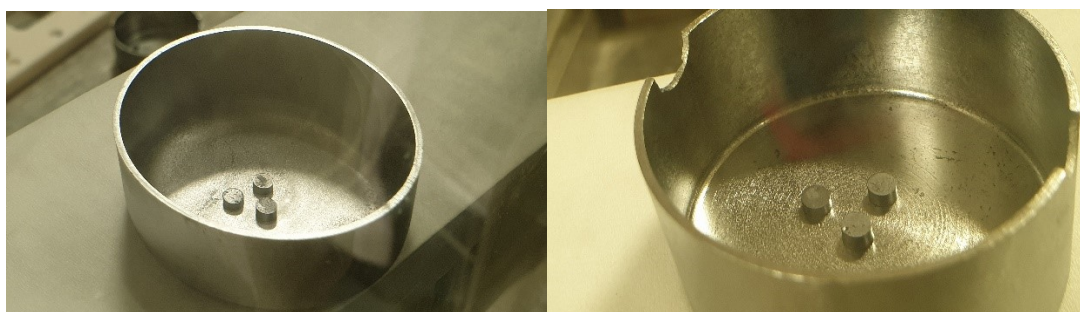

**Fig. S2** Pictures of the sintered disks: U<sub>0.90</sub>Am<sub>0.10</sub>O<sub>2</sub> (left) and U<sub>0.80</sub>Am<sub>0.20</sub>O<sub>2</sub> (right)

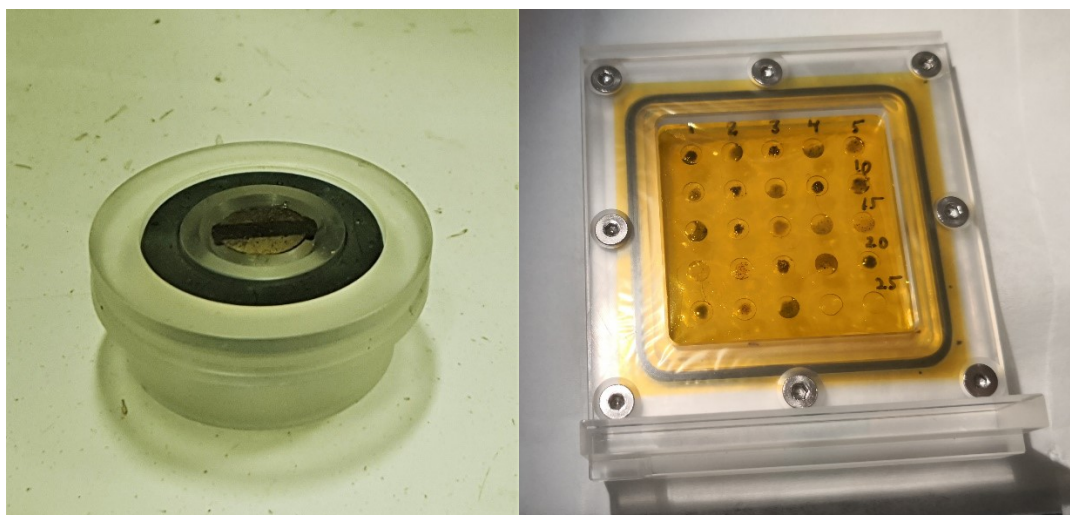

**Fig. S3** Sample holders with embedded material for XRD and XAS measurements

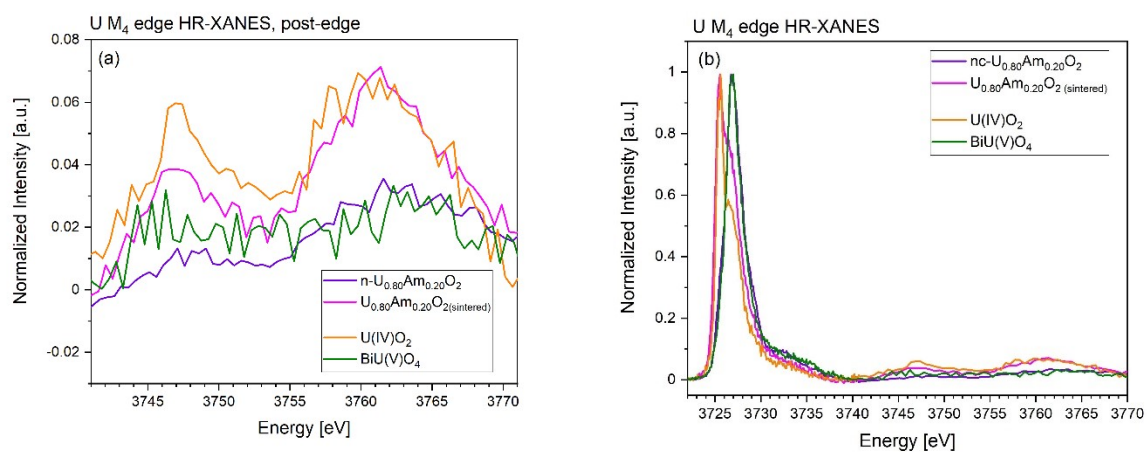

**Fig. S4** HR-XANES U M<sub>4</sub> edge for as-synthesised nanoparticles (lilac) and sintered (magenta)  $\text{U}_{0.80}\text{Am}_{0.20}\text{O}_2$  samples in the post-edge (a) and whole energy (b) range along with the  $\text{U(IV)O}_2$  (orange) and the  $\text{BiU(V)O}_4$  (green) references.

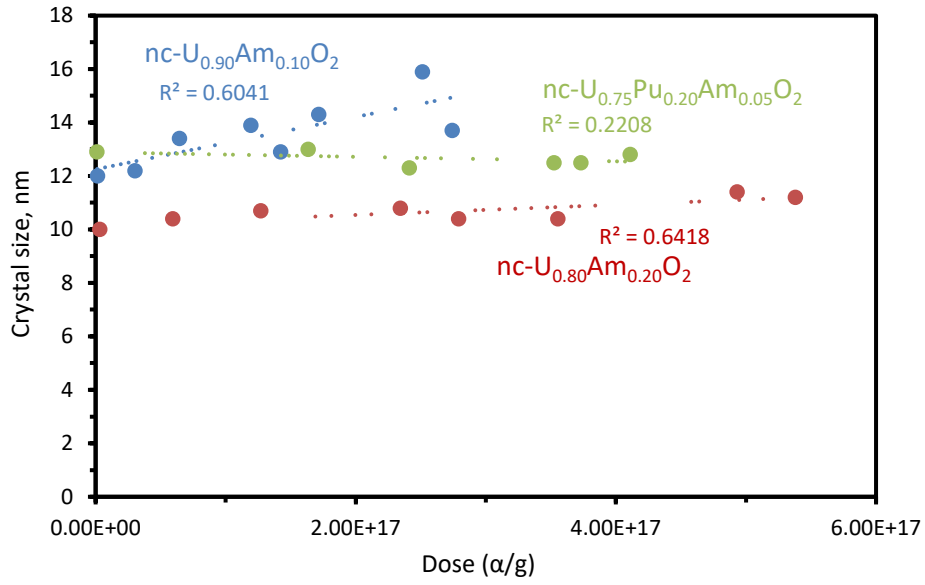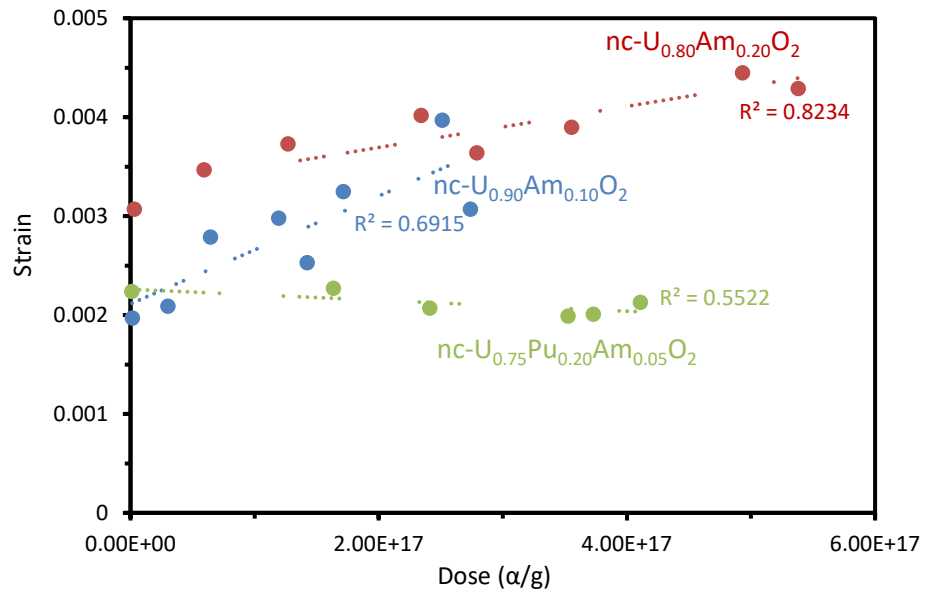

**Fig. S5.** Variation of crystal size (top) and strain (bottom) of nanocrystalline materials as a function on alpha dose

**Table S1.** Characterisation of sintered disks out of geometrical measurements (calculated for a theoretical density of 11 g/cm<sup>3</sup>)

| Composition                                                               | Disk/<br>Pellet | h,<br>mm | d,<br>mm | m,<br>mg | $\rho$ ,<br>g/cm <sup>3</sup> | % TD        |             | Observations |
|---------------------------------------------------------------------------|-----------------|----------|----------|----------|-------------------------------|-------------|-------------|--------------|
|                                                                           |                 |          |          |          |                               | Geometrical | Hydrostatic |              |
| U <sub>0.90</sub> Am <sub>0.10</sub> O <sub>2.00</sub>                    | 1               | 1.765    | 3.424    | 189      | 10.382                        | 94.64       |             |              |
|                                                                           | 2               | 2.230    | 3.611    | 240      | 10.509                        | 95.80       | 98.80       |              |
|                                                                           | 3               | 1.668    | 3.640    | 166      | 9.564                         | 87.18       |             |              |
| U <sub>0.80</sub> Am <sub>0.20</sub> O <sub>2.00</sub>                    | 1               | 1.628    | 3.73     | 179      | 10.062                        | 91.72       |             | <sup>a</sup> |
|                                                                           | 2               | 2.348    | 3.82     | 247      | 9.080                         | 82.80       |             | <sup>a</sup> |
|                                                                           | 3               | 2.055    | 3.675    | 222      | 10.185                        | 92.94       | 96.04       |              |
| U <sub>0.75</sub> Pu <sub>0.20</sub> Am <sub>0.05</sub> O <sub>2-x</sub>  | 1               | 0.762    | 4.247    | 86       | 7.971                         | 72.46       |             | <sup>a</sup> |
|                                                                           | 2               | 1.223    | 4.244    | 150      | 8.674                         | 78.86       |             | <sup>a</sup> |
|                                                                           | 3               | 1.234    | 4.261    | 150      | 8.529                         | 77.53       |             | <sup>a</sup> |
| U <sub>0.75</sub> Pu <sub>0.20</sub> Am <sub>0.05</sub> O <sub>2.00</sub> | 1               | 0.780    | 4.172    | 102      | 9.571                         | 87.00       |             |              |
|                                                                           | 2               | 1.168    | 4.149    | 149      | 9.440                         | 85.82       |             |              |
|                                                                           | 3               | 6.957    | 4.133    | 854      | 9.155                         | 83.22       |             | <sup>a</sup> |

<sup>a</sup> anisotropic radial shrinkage

**Table S2.** Uranium and plutonium isotopic compositions

|                      | Mass fraction, wt% | Uncertainty, wt% [k = 2] |
|----------------------|--------------------|--------------------------|
| <sup>233</sup> U/U   | < 0.001            | -                        |
| <sup>234</sup> U/U   | 0.00530            | 0.00052                  |
| <sup>235</sup> U/U   | 0.7124             | 0.0022                   |
| <sup>236</sup> U/U   | < 0.001            | -                        |
| <sup>238</sup> U/U   | 99.2823            | 0.0072                   |
| <sup>238</sup> Pu/Pu | 0.01398            | 0.00084                  |
| <sup>239</sup> Pu/Pu | 90.713             | 0.018                    |
| <sup>240</sup> Pu/Pu | 9.1170             | 0.0048                   |
| <sup>241</sup> Pu/Pu | 0.0824             | 0.0049                   |
| <sup>242</sup> Pu/Pu | 0.0732             | 0.0060                   |

**Table S3.** Variation of crystal size and strain of nanocrystalline materials as a function on alpha dose

| <i>nc-U<sub>0.90</sub>Am<sub>0.10</sub>O<sub>2</sub></i> |        |         | <i>nc-U<sub>0.80</sub>Am<sub>0.20</sub>O<sub>2</sub></i> |        |         | <i>nc-U<sub>0.75</sub>Pu<sub>0.20</sub>Am<sub>0.05</sub>O<sub>2</sub></i> |        |         |
|----------------------------------------------------------|--------|---------|----------------------------------------------------------|--------|---------|---------------------------------------------------------------------------|--------|---------|
| Dose, $\alpha/g$                                         | CS, nm | strain  | Dose, $\alpha/g$                                         | CS, nm | strain  | Dose, $\alpha/g$                                                          | CS, nm | strain  |
| 1.28E+15                                                 | 12.0   | 0.00197 | 2.96E+15                                                 | 10.0   | 0.00307 | 8.66E+14                                                                  | 12.9   | 0.00224 |
| 3.00E+16                                                 | 12.2   | 0.00209 | 5.93E+16                                                 | 10.4   | 0.00347 | 1.63E+17                                                                  | 13.0   | 0.00227 |
| 6.45E+16                                                 | 13.4   | 0.00279 | 1.27E+17                                                 | 10.7   | 0.00373 | 2.41E+17                                                                  | 12.3   | 0.00207 |
| 1.19E+17                                                 | 13.9   | 0.00298 | 2.34E+17                                                 | 10.8   | 0.00402 | 3.52E+17                                                                  | 12.5   | 0.00199 |
| 1.42E+17                                                 | 12.9   | 0.00253 | 2.79E+17                                                 | 10.4   | 0.00364 | 3.73E+17                                                                  | 12.5   | 0.00201 |
| 1.71E+17                                                 | 14.3   | 0.00325 | 3.55E+17                                                 | 10.4   | 0.0039  | 4.11E+17                                                                  | 12.8   | 0.00213 |
| 2.51E+17                                                 | 15.9   | 0.00397 | 4.93E+17                                                 | 11.4   | 0.00445 |                                                                           |        |         |
| 2.74E+17                                                 | 13.7   | 0.00307 | 5.38E+17                                                 | 11.2   | 0.00429 |                                                                           |        |         |
